# Supplementary material for: Real time and space observation of domain wall migration in a MX-chain complex with a quasi-2D CDW state by using STM
Source: Royal Society of Chemistry journal article supplement (doi:10.1039/c0dt01051k), 2010-12-10
Supplement: c0dt01051k.pdf [file c0dt01051k.pdf]

Electronic Supplementary Information of

Real Time and Space Observation of Domain Wall Migration in  
Quasi-1D Bromo-Bridged Palladium Complex by STM

*Shinya Takaishi,\* Hashen Wu, Takashi Kajiwara, Brian K. Breedlove, Hitoshi Miyasaka, Masahiro  
Yamashita,\**

Table 1 Crystallographic data of [Pd(chxn)<sub>2</sub>Br]Br<sub>2</sub> and [Pd(chxn-*d*<sub>4</sub>)<sub>2</sub>Br]Br<sub>2</sub>

| Sample                                   | [Pd(chxn) <sub>2</sub> Br]Br <sub>2</sub> <sup>*</sup>                         | [Pd(chxn- <i>d</i> <sub>4</sub> ) <sub>2</sub> Br]Br <sub>2</sub>                             |
|------------------------------------------|--------------------------------------------------------------------------------|-----------------------------------------------------------------------------------------------|
| Empirical Formula                        | C <sub>12</sub> H <sub>28</sub> Br <sub>3</sub> N <sub>4</sub> Pd <sub>1</sub> | C <sub>12</sub> H <sub>20</sub> D <sub>8</sub> Br <sub>3</sub> N <sub>4</sub> Pd <sub>1</sub> |
| Formula Weight                           | 574.51                                                                         | 582.56                                                                                        |
| Temperature [K]                          | 295                                                                            | 93(2)                                                                                         |
| Wavelength [Å]                           | 0.71073                                                                        | 0.71073                                                                                       |
| Crystal System                           | Orthorhombic                                                                   | Orthorhombic                                                                                  |
| Space Group                              | <i>I</i> 222                                                                   | <i>I</i> 222                                                                                  |
| <i>a</i> [Å]                             | 23.884(3)                                                                      | 23.778(3)                                                                                     |
| <i>b</i> [Å]                             | 5.293(1)                                                                       | 5.2774(9)                                                                                     |
| <i>c</i> [Å]                             | 7.073(1)                                                                       | 6.9908(10)                                                                                    |
| <i>V</i> [Å <sup>3</sup> ]               | 894.2(2)                                                                       | 877.2(2)                                                                                      |
| <i>Z</i>                                 | 2                                                                              | 2                                                                                             |
| Density (calcd.) [Mg/m <sup>3</sup> ]    | 2.134                                                                          | 2.175                                                                                         |
| Goodness-of fit on <i>F</i> <sup>2</sup> | 0.85                                                                           | 1.137                                                                                         |
| Final <i>R</i> indices                   | <i>R</i> <sub>1</sub> =0.032 ( <i>I</i> >3σ( <i>I</i> ))                       | <i>R</i> <sub>1</sub> =0.0381 w <i>R</i> <sub>2</sub> =0.1095 ( <i>I</i> >2σ( <i>I</i> ))     |
| Final <i>R</i> (all data)                | –                                                                              | <i>R</i> <sub>1</sub> =0.0394 w <i>R</i> <sub>2</sub> =0.1101                                 |

<sup>\*</sup>Z. Hazel, *Acta. Crystallogr. C*, 1991, **47**, 962.

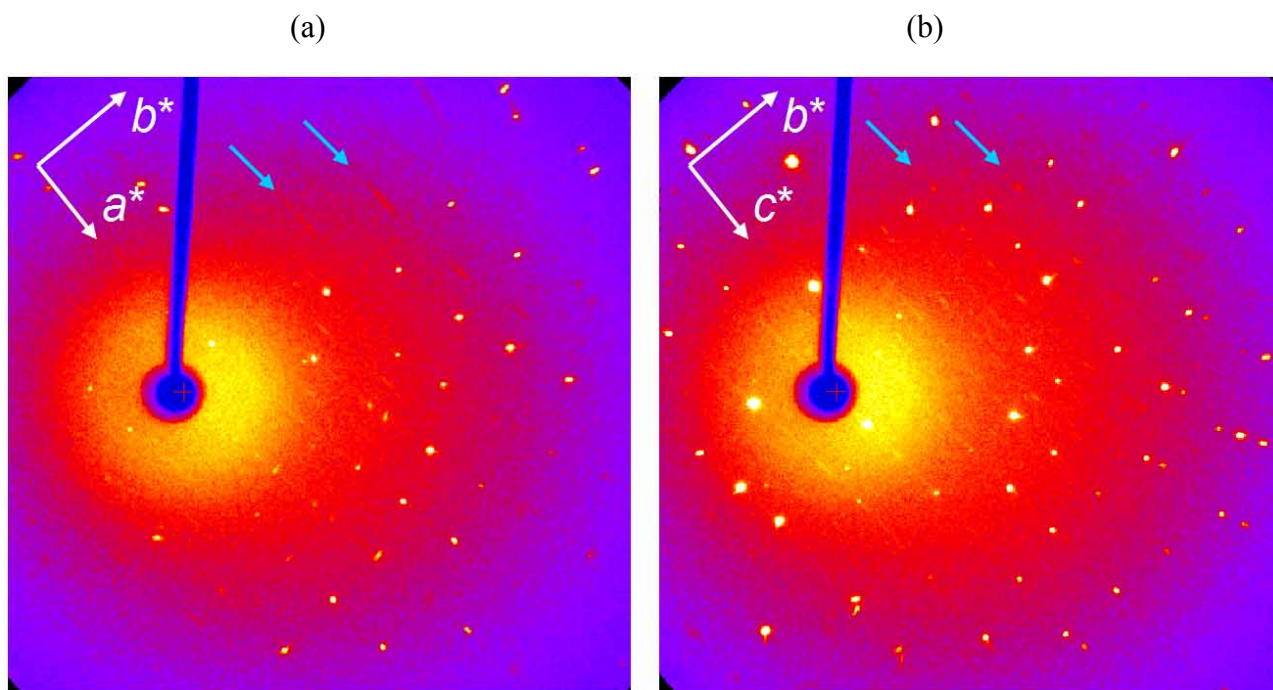

Figure S1 Oscillation photograph of  $[\text{Pd}(\text{chxn-}d_4)_2\text{Br}]\text{Br}_2$ . (a)  $a^*b^*$  plane (b)  $b^*c^*$  plane. Light blue arrows show diffuse scatterings.
